# Supplementary material for: Ethanolamine-phosphate phospho-lyase (ETNPPL) contributes to the diagnosis, prognosis, and therapy of hepatocellular carcinoma
Source: PeerJ. 2023 Aug 21;11:e15834. doi: 10.7717/peerj.15834 (PMC10448887; doi:10.7717/peerj.15834)
Supplement: Supplemental Information 3 [file peerj-11-15834-s003.xlsx]

## Sheet: Sheet1
L-02
	Well	Sample Name	Ct	Well	Sample Name	Ct
	A4	GAPDH	19.6984	A1	ETNPPL	20.1374
	A5	GAPDH	19.6202	A2	ETNPPL	20.143
	A6	GAPDH	19.5445	A3	ETNPPL	20.0627
HuH-7
	Well	Sample Name	Ct	Well	Sample Name	Ct
	B4	GAPDH	19.7812	B1	ETNPPL	21.7602
	B5	GAPDH	19.5898	B2	ETNPPL	21.7584
	B6	GAPDH	19.9459	B3	ETNPPL	21.8213
Li-7
	Well	Sample Name	Ct	Well	Sample Name	Ct
	C4	GAPDH	19.896	C1	ETNPPL	21.5433
	C5	GAPDH	19.9696	C2	ETNPPL	21.4394
	C6	GAPDH	19.9741	C3	ETNPPL	21.745
SK-HEP-1
	Well	Sample Name	Ct	Well	Sample Name	Ct
	D4	GAPDH	19.7966	D1	ETNPPL	21.1282
	D5	GAPDH	19.8397	D2	ETNPPL	21.2457
	D6	GAPDH	19.9483	D3	ETNPPL	21.0131
